# Supplementary material for: Quantification of acidic sites of nanoscopic hydroxylated magnesium fluorides by FTIR and 15N MAS NMR spectroscopy
Source: Royal Society of Chemistry journal article supplement (doi:10.1039/c5ra15116c), 2015-01-01
Supplement: c5ra15116c1.pdf [file c5ra15116c1.pdf]

# 1 Quantification of Acidic Sites of Nanoscopic Hydroxylated Magnesium 2 Fluorides by FTIR and <sup>15</sup>N MAS NMR Spectroscopy

3 Felix Hemmann<sup>a,b</sup>, Iker Agirrezabal-Telleria<sup>c</sup>, Christian Jaeger<sup>b</sup>, Erhard Kemnitz<sup>a\*</sup>

4 <sup>a</sup> Humboldt-Universität zu Berlin, Department of Chemistry, Brook – Taylor – Str. 2, D – 12489 Berlin,  
5 Germany

6 <sup>b</sup> BAM Federal Institute for Materials Research and Testing, Division 1, Richard Willstaetter Str. 11, D-12489  
7 Berlin, Germany

8 <sup>c</sup> Department of Chemical and Environmental Engineering, Engineering School of the University of the Basque  
9 Country (UPV/EHU), Alameda Urquijo s/n, 48013 Bilbao, Spain.

10

11

12

13 **Transposing of equation 4 for Figure 1**

$$14 \quad 1 = \frac{\frac{dA_{LPy}}{dn}}{\varepsilon'_{LPy}} + \frac{\frac{dA_{BPY}}{dn}}{\varepsilon'_{BPY}} \quad | * \varepsilon'_{LPy} * \varepsilon'_{BPY}$$

$$15 \quad \varepsilon'_{BPY} * \varepsilon'_{LPy} = \frac{dA_{LPy}}{dn} * \varepsilon'_{BPY} + \frac{dA_{BPY}}{dn} * \varepsilon'_{LPy} \quad | - \frac{dA_{LPy}}{dn} * \varepsilon'_{BPY}$$

$$16 \quad \frac{dA_{BPY}}{dn} * \varepsilon'_{LPy} = \varepsilon'_{BPY} * \varepsilon'_{LPy} - \frac{dA_{LPY}}{dn} * \varepsilon'_{BPY}$$

$$17 \quad \frac{dA_{BPY}}{dn} * \varepsilon'_{LPy} = \varepsilon'_{BPY} * \left( \varepsilon'_{LPy} - \frac{dA_{LPY}}{dn} \right) \quad || \left( \varepsilon'_{LPy} - \frac{dA_{LPY}}{dn} \right)$$

$$18 \quad \varepsilon'_{BPY} = \frac{\frac{dA_{BPY}}{dn} * \varepsilon'_{LPy}}{\varepsilon'_{LPy} - \frac{dA_{LPY}}{dn}}$$

19

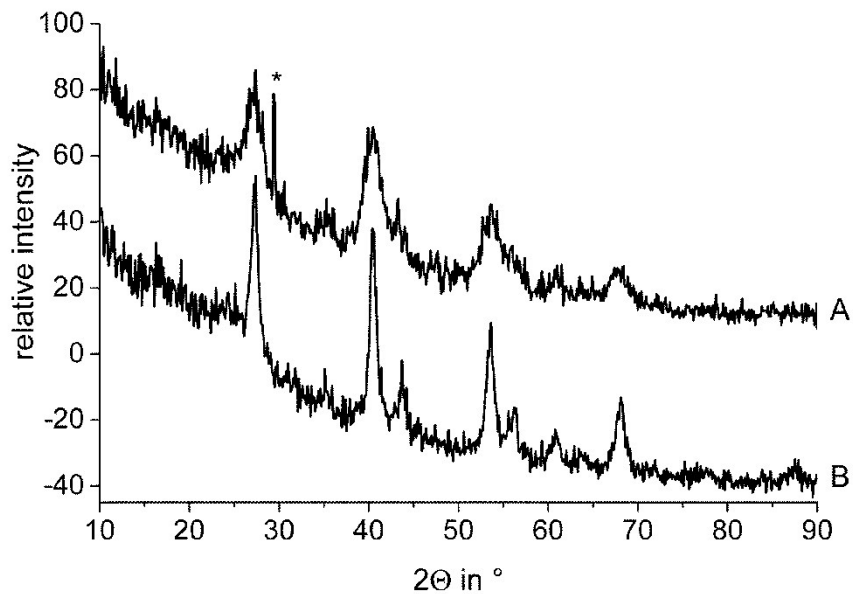

1

2 SI Figure 1: X-Ray powder diffraction patterns of a hydroxylated magnesium fluoride sample before (A) and  
 3 after it was calcinated at 300°C for 2 h (B). \* indicate reflex of the sample holder.

4

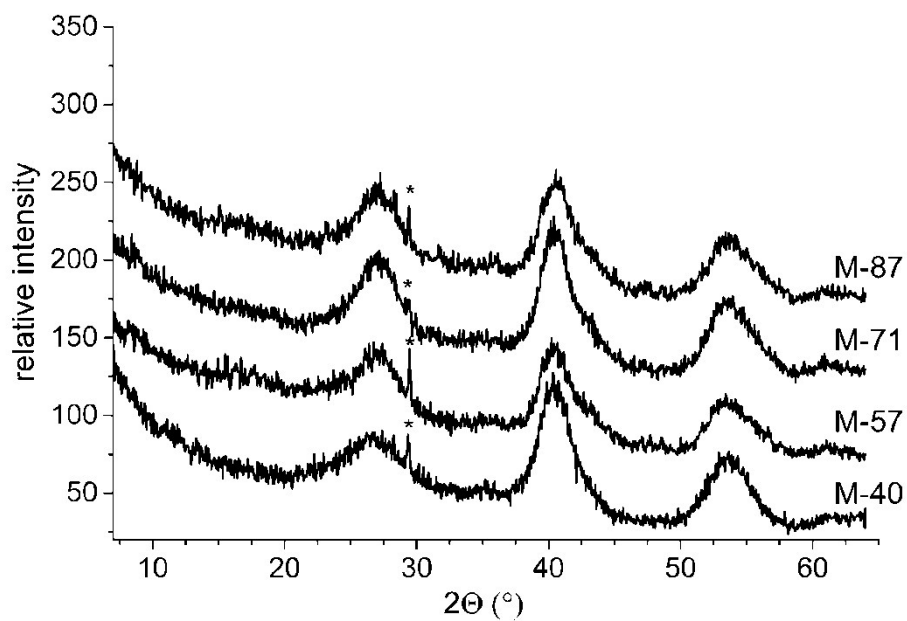

5

6 SI Figure 2: X-Ray powder diffraction patterns of the four hydroxylated magnesium fluoride samples. \* indicate  
 7 reflex of the sample holder.

8

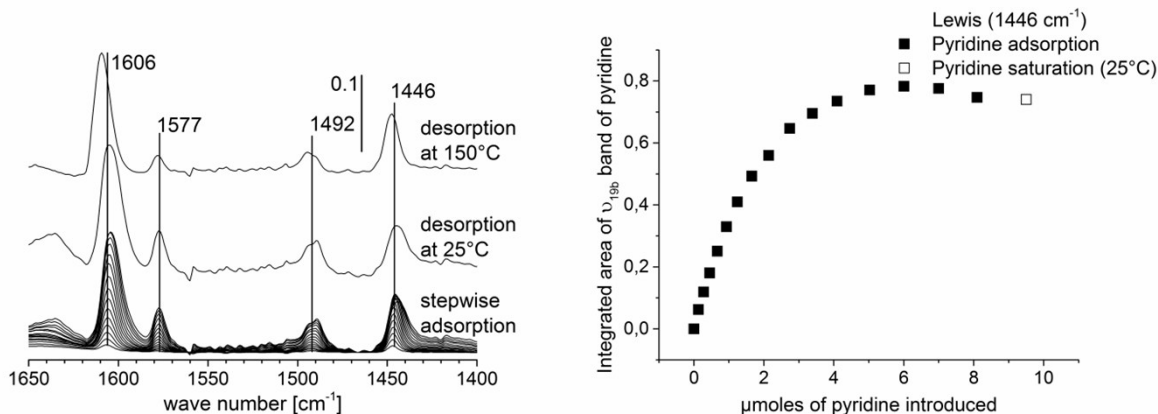

1  
 2 SI Figure 3. FTIR spectra after stepwise pyridine adsorption at ungrounded M-40 and the integrated intensity of  
 3  $\nu_{19b}$  band of coordinated pyridine at about 1446 cm<sup>-1</sup>. Also shown is the integrated intensity of  $\nu_{19b}$  band after  
 4 saturation with pyridine (open symbol).

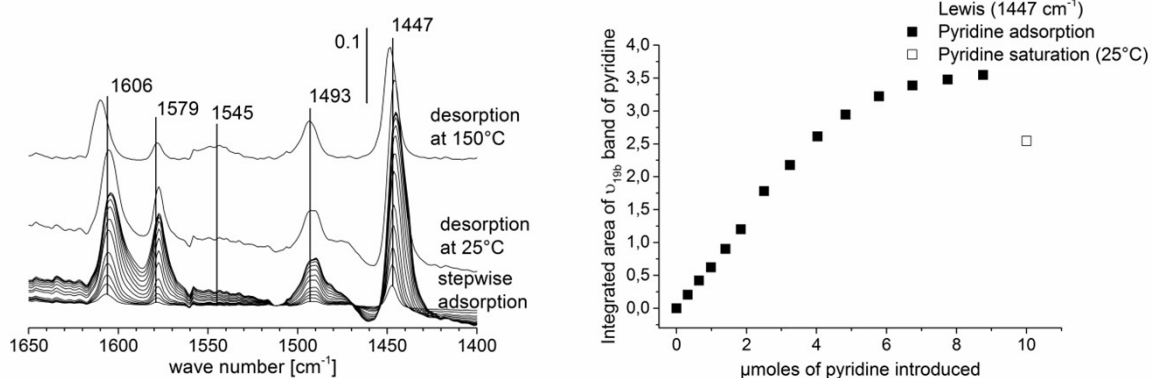

5  
 6 SI Figure 4. FTIR spectra after stepwise pyridine adsorption at ungrounded M-71 and the integrated intensity of  
 7  $\nu_{19b}$  band of coordinated pyridine at about 1447 cm<sup>-1</sup>. Also shown is the integrated intensity of  $\nu_{19b}$  band after  
 8 saturation with pyridine (open symbol).

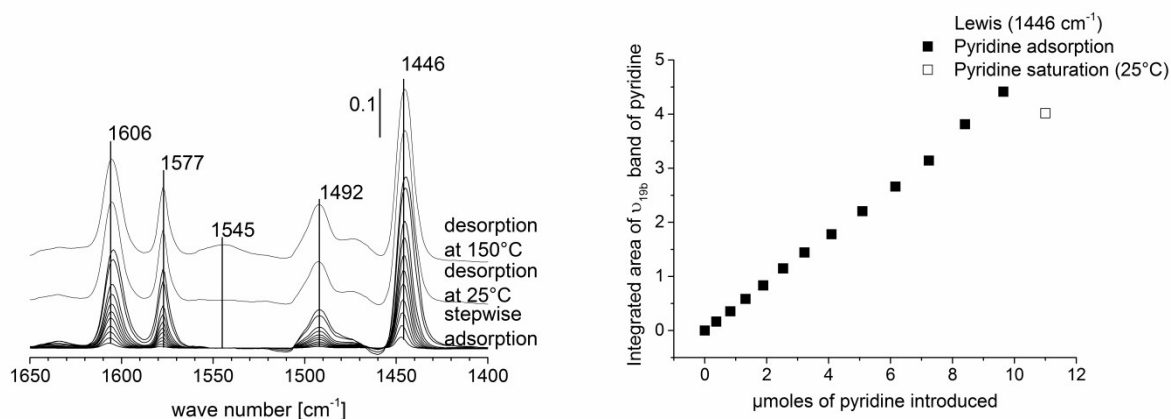

9  
 10 SI Figure 5. FTIR spectra after stepwise pyridine adsorption at ungrounded M-87 and the integrated intensity of  
 11  $\nu_{19b}$  band of coordinated pyridine at about 1446 cm<sup>-1</sup>. Also shown is the integrated intensity of  $\nu_{19b}$  band after  
 12 saturation with pyridine (open symbol).

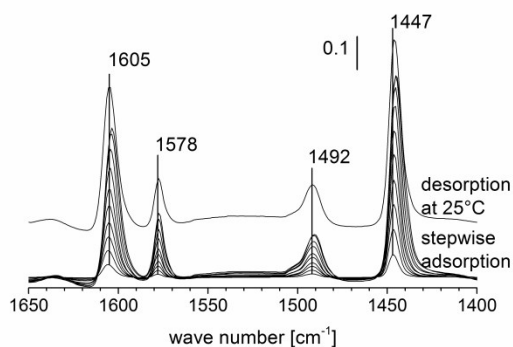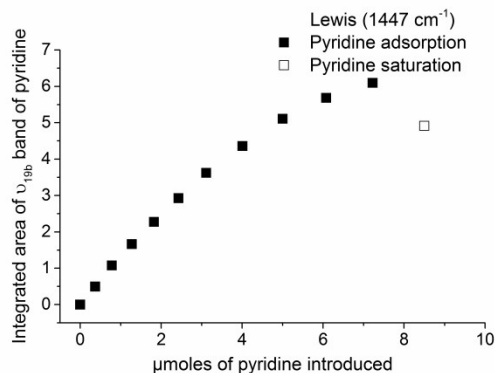

1  
 2 SI Figure 6. FTIR spectra after stepwise pyridine adsorption at grounded M-40 and the integrated intensity of  
 3  $\nu_{19b}$  band of coordinated pyridine at about  $1447\text{ cm}^{-1}$  versus pyridine introduced into the cell. Also shown is the  
 4 integrated intensity of  $\nu_{19b}$  band after saturation with pyridine (open symbol).

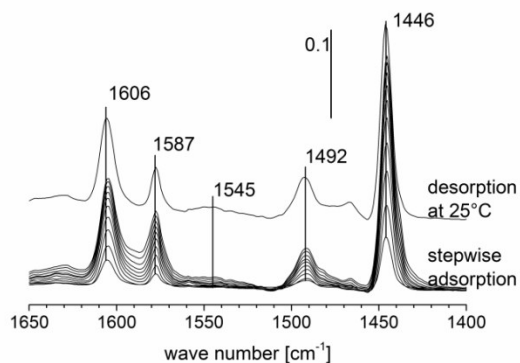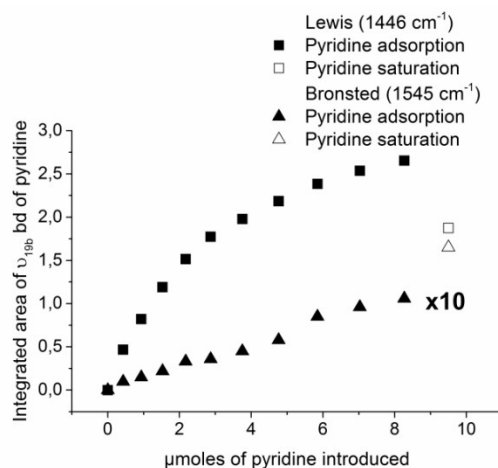

5  
 6 SI Figure 7. FTIR spectra after stepwise pyridine adsorption at grounded M-57 and the integrated intensity of  
 7  $\nu_{19b}$  band of coordinated pyridine at about  $1446\text{ cm}^{-1}$  and protonated pyridine at about  $1545\text{ cm}^{-1}$ . In the intensity  
 8 plot, the signal intensity of the protonated pyridine is multiplied by a factor of ten. Also shown are the integrated  
 9 intensities of  $\nu_{19b}$  band after saturation with pyridine (open symbol).

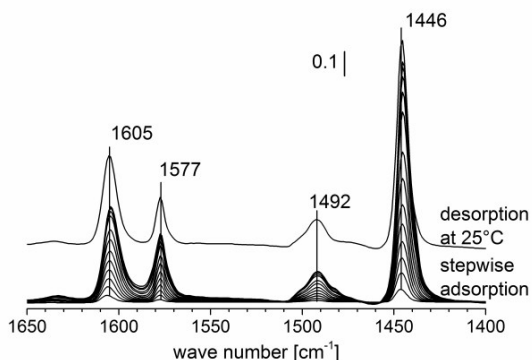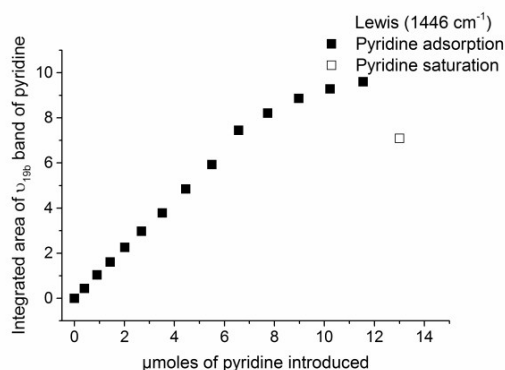

10  
 11 SI Figure 8. FTIR spectra after stepwise pyridine adsorption at grounded M-71 and the integrated intensity of  
 12  $\nu_{19b}$  band of coordinated pyridine at about  $1447\text{ cm}^{-1}$  versus pyridine introduced into the cell. Also shown is the  
 13 integrated intensity of  $\nu_{19b}$  band after saturation with pyridine (open symbol).

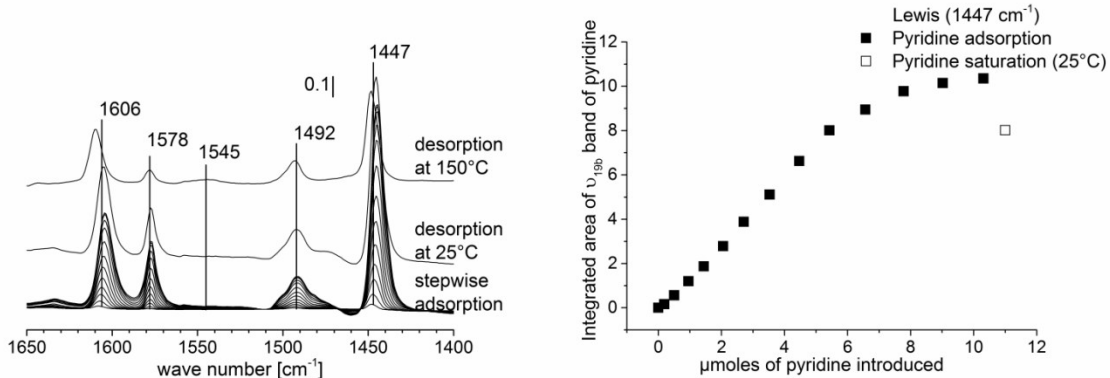

1  
 2 SI Figure 9. FTIR spectra after stepwise pyridine adsorption at grounded M-87 and the integrated intensity of  
 3  $\nu_{19b}$  band of coordinated pyridine at about 1446 cm<sup>-1</sup>. Also shown is the integrated intensity of  $\nu_{19b}$  band after  
 4 saturation with pyridine (open symbol).

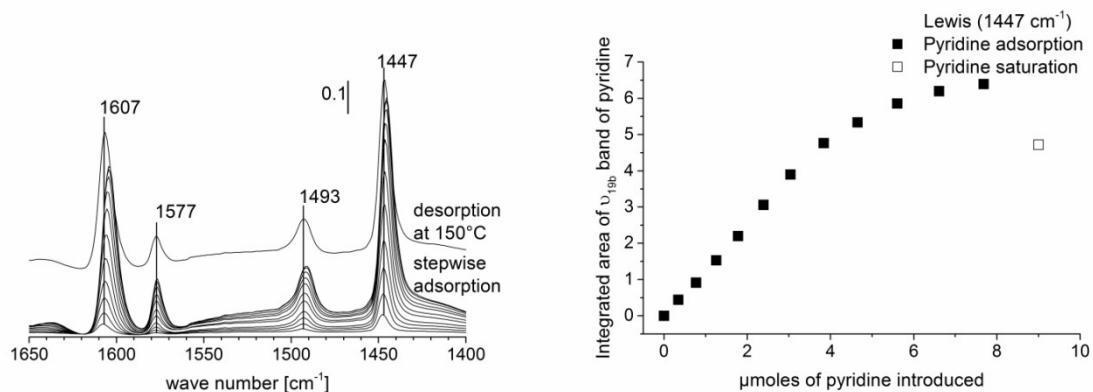

5  
 6 SI Figure 10. FTIR spectra after stepwise pyridine adsorption at 150°C at grounded M-40 and the integrated  
 7 intensity of  $\nu_{19b}$  band of coordinated pyridine at about 1447 cm<sup>-1</sup>. Also shown is the integrated intensity of  $\nu_{19b}$   
 8 band after saturation with pyridine (open symbol).

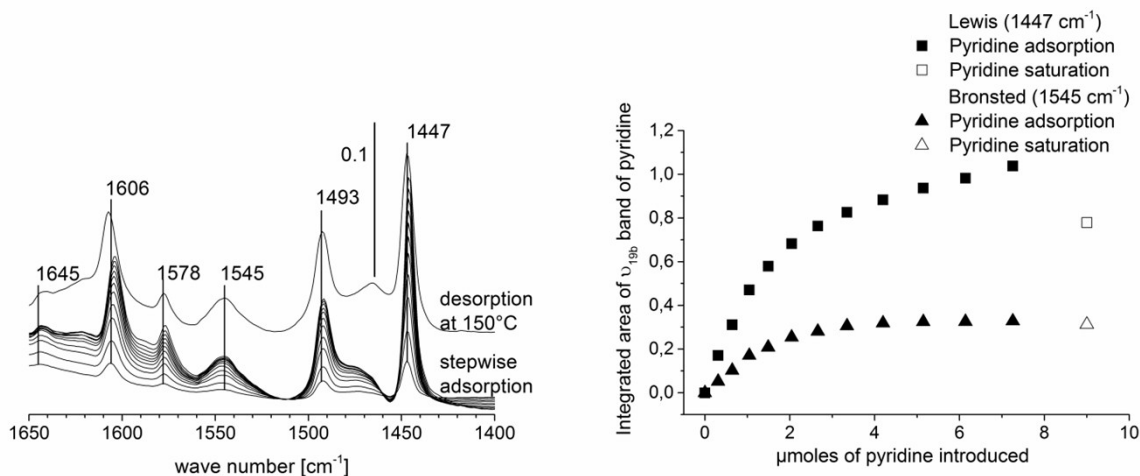

9  
 10 SI Figure 11. FTIR spectra after stepwise pyridine adsorption at 150°C at grounded M-57 and the integrated  
 11 intensity of  $\nu_{19b}$  band of coordinated pyridine at about 1447 cm<sup>-1</sup> and protonated pyridine at about 1545 cm<sup>-1</sup>.  
 12 Also shown are the integrated intensities of  $\nu_{19b}$  band after saturation with pyridine (open symbol).

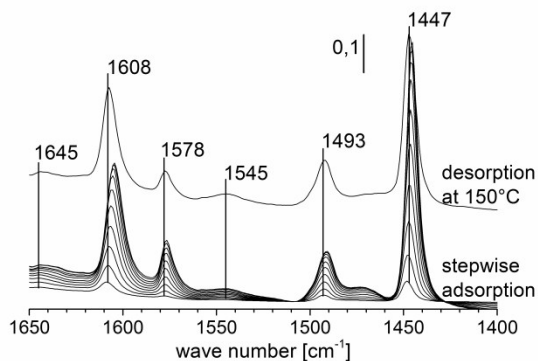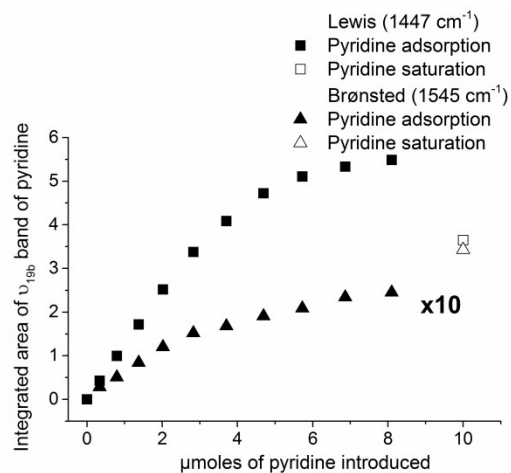

1  
 2 SI Figure 12. FTIR spectra after stepwise pyridine adsorption at 150°C at grounded M-71 and the integrated  
 3 intensity of  $\nu_{196}$  band of coordinated pyridine at about 1447  $\text{cm}^{-1}$  and 1545  $\text{cm}^{-1}$ . In the intensity plot, the signal  
 4 intensity of the protonated pyridine is multiplied by a factor of ten. Also shown are the integrated intensities of  
 5  $\nu_{196}$  band after saturation with pyridine (open symbol).

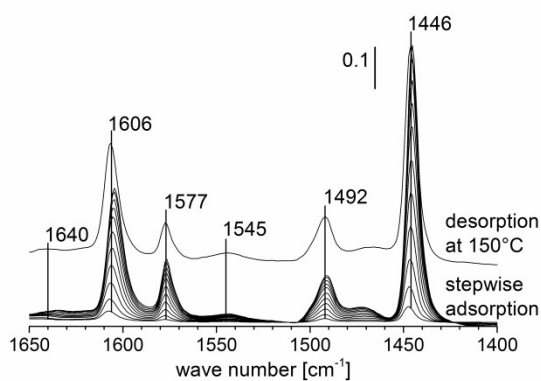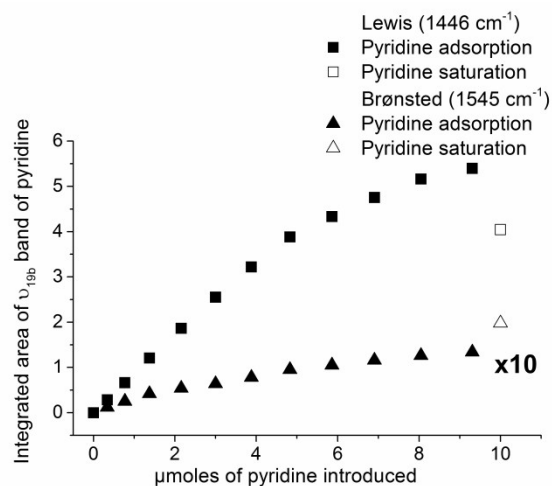

6  
 7 SI Figure 13. FTIR spectra after stepwise pyridine adsorption at 150°C at grounded M-87 and the integrated  
 8 intensity of  $\nu_{196}$  band of coordinated pyridine at about 1446  $\text{cm}^{-1}$  and 1545  $\text{cm}^{-1}$ . In the intensity plot, the signal  
 9 intensity of the protonated pyridine is multiplied by a factor of ten. Also shown are the integrated intensities of  
 10  $\nu_{196}$  band after saturation with pyridine (open symbol).

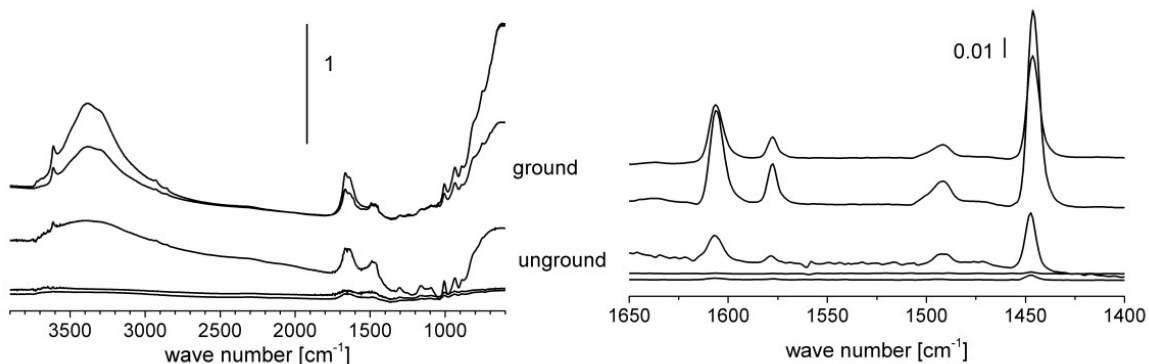

11

1 SI Figure 14: FTIR spectra of grounded and ungrounded samples of M-71 (left) and segment of FTIR difference  
 2 spectra of the same samples, in which the characteristic bands of pyridine occur, after about 0.5  $\mu\text{mol}$  of pyridine  
 3 were adsorbed at 25°C (right).

4

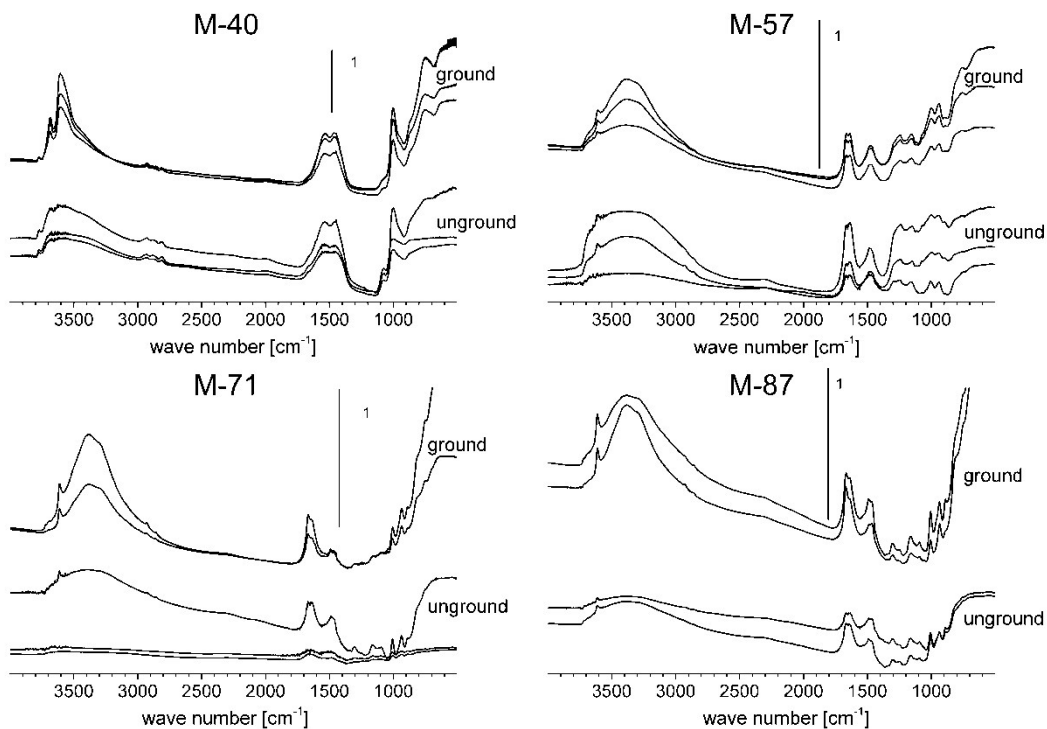

5

6 SI Figure 15: FTIR spectra of several grounded and ungrounded samples of the four hydroxylated magnesium  
 7 fluorides before pyridine adsorption.

8

9 SI Table 1: BET surface areas for the ungrounded and grounded sample M-40.

| M-40       | BET surface area [ $\text{m}^2/\text{g}$ ] |
|------------|--------------------------------------------|
| ungrounded | 282                                        |
| Grounded   | 300                                        |

10

11
